# Supplementary material for: Elemental and molecular mass spectrometric strategies for probing interactions between DNA and new Ru(ii) complexes containing phosphane ligands and either a tris(pyrazol-1-yl)borate or a pyridine bis(oxazoline) ligand
Source: Royal Society of Chemistry journal article supplement (doi:10.1039/c4ja00308j), 2014-11-19
Supplement: c4ja00308j1.pdf [file c4ja00308j1.pdf]

A)

**Asr3**

**Asr7**

**Asr12**

**Asr14**

B)

**Ru-iPr-pybox**

**Ru-Ph-pybox**

Figure 1S  
Supplementary Electronic Material  
Molecular structure of the evaluated Ru(II)-containing  
complexes: A) Ru-Tp complexes and B) Ru-pybox complexes.

A)

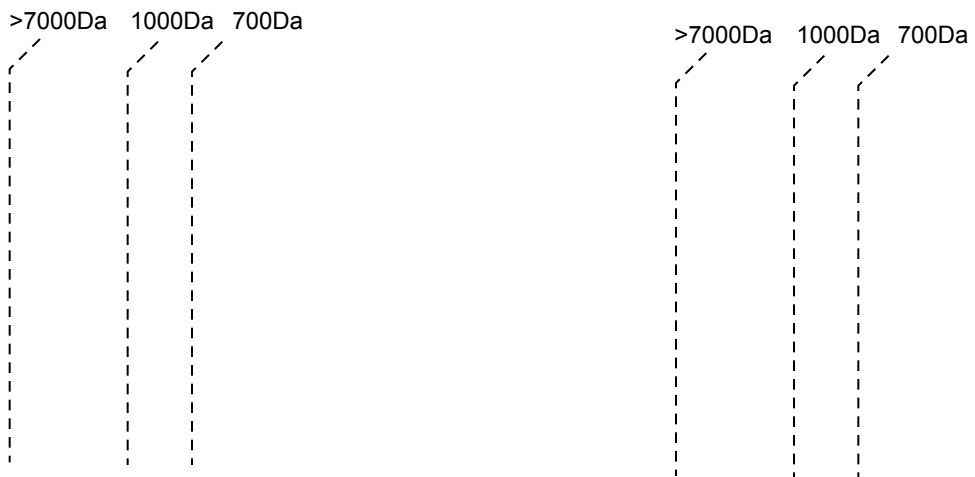

Figure 2S

Separation by size exclusion chromatography using ICP-MS detection of the reaction products obtained by the interaction of calf thymus DNA and Asr3. A) The chromatogram of Asr3, B) Asr3 + native DNA and C) Asr3 + denatured DNA.
